# Supplementary material
Source: PubMed Central journal article supplement (PMC5740355)
Supplement: AAC.01427-17_zac001186799s1.pdf [file AAC.01427-17_zac001186799s1.pdf]

Table S1. Determination of the minimal inhibitory concentration (mg/l) on day 3, 5, 7 and 12.<sup>a</sup>

| Strain        | <i>M. abscessus</i> ATCC 19977 <sup>T</sup> |      |      |      | ΔMAB_2385 |      |      |      | ΔMAB_2385 pMV361- <i>aac(3)IV</i> |      |      |      | ΔMAB_2385 pMV361- <i>aac(3)IV</i> -MAB_2385 |      |      |      |
|---------------|---------------------------------------------|------|------|------|-----------|------|------|------|-----------------------------------|------|------|------|---------------------------------------------|------|------|------|
|               | 3                                           | 5    | 7    | 12   | 3         | 5    | 7    | 12   | 3                                 | 5    | 7    | 12   | 3                                           | 5    | 7    | 12   |
| Streptomycin  | 16                                          | 64   | 128  | 128  | 1         | 2    | 2    | 2    | 1                                 | 2    | 2    | 2    | 16                                          | 32   | 32   | 32   |
|               | 16                                          | 32   | 32   | 64   | 2         | 2    | 2    | 4    | 1                                 | 2    | 2    | 4    | 16                                          | 32   | 32   | 64   |
|               | 16                                          | 32   | 32   | 64   | 1         | 2    | 2    | 4    | 1                                 | 2    | 2    | 4    | 16                                          | 32   | 32   | 64   |
| Spectinomycin | 256                                         | >256 | >256 | >256 | 256       | 256  | >256 | >256 | 128                               | >256 | >256 | >256 | 256                                         | >256 | >256 | >256 |
|               | 64                                          | >256 | >256 | >256 | 128       | >256 | >256 | >256 | 128                               | >256 | >256 | >256 | 64                                          | >256 | >256 | >256 |
|               | 64                                          | >256 | >256 | >256 | 64        | >256 | >256 | >256 | 128                               | >256 | >256 | >256 | 128                                         | >256 | >256 | >256 |
| Apramycin     | 0.5                                         | 0.5  | 0.5  | 1    | 0.5       | 0.5  | 0.5  | 1    | not available                     |      |      |      | not available                               |      |      |      |
|               | 0.5                                         | 0.5  | 0.5  | 0.5  | 0.5       | 0.5  | 1    | 1    | not available                     |      |      |      | not available                               |      |      |      |
|               | 0.5                                         | 0.5  | 0.5  | 1    | 0.5       | 0.5  | 0.5  | 1    | not available                     |      |      |      | not available                               |      |      |      |
| Kanamycin A   | 0.5                                         | 1    | 2    | 2    | 0.5       | 1    | 2    | 2    | not available                     |      |      |      | not available                               |      |      |      |
|               | 0.5                                         | 1    | 1    | 2    | 0.5       | 1    | 1    | 4    | not available                     |      |      |      | not available                               |      |      |      |
|               | 0.5                                         | 1    | 1    | 2    | 0.5       | 1    | 1    | 2    | not available                     |      |      |      | not available                               |      |      |      |
| Kanamycin B   | 4                                           | 8    | 16   | 16   | 4         | 8    | 8    | 16   | not available                     |      |      |      | not available                               |      |      |      |
|               | 2                                           | 8    | 16   | 64   | 2         | 8    | 8    | 16   | not available                     |      |      |      | not available                               |      |      |      |
|               | 2                                           | 4    | 8    | 16   | 2         | 4    | 8    | 32   | not available                     |      |      |      | not available                               |      |      |      |
| Amikacin      | 0.5                                         | 2    | 4    | 4    | 0.5       | 2    | 2    | 4    | 0.5                               | 2    | 4    | 8    | 0.5                                         | 2    | 4    | 4    |
|               | 0.5                                         | 1    | 2    | 4    | 0.5       | 1    | 4    | 2    | 0.5                               | 4    | 4    | 8    | 0.5                                         | 2    | 4    | 4    |
|               | 0.5                                         | 2    | 4    | 4    | 0.5       | 1    | 2    | 4    | 0.5                               | 2    | 4    | 8    | 0.5                                         | 1    | 2    | 4    |
| Hygromycin B  | 128                                         | 256  | 256  | 256  | 128       | 256  | 256  | 256  | 128                               | 256  | 256  | 256  | 128                                         | 256  | 256  | 256  |
|               | 128                                         | 256  | 256  | >256 | 128       | 256  | 256  | >256 | 128                               | 256  | 256  | >256 | 128                                         | 256  | 256  | 256  |
|               | 64                                          | 256  | 256  | 256  | 64        | 256  | 256  | 256  | 64                                | 256  | 256  | 256  | 64                                          | 256  | 256  | 256  |

<sup>a</sup>Broth microdilutions in cation adjusted Muller Hinton
